# Supplementary material for: Development and validation of the Italian version of the Mobile Application Rating Scale and its generalisability to apps targeting primary prevention
Source: Springer Nature journal article supplement (doi:10.1186/s12911-016-0323-2), 2016-07-07

**Table S1** Intra-class correlation coefficients, by item

| Subscale           | Item | ICC      |           |          |
|--------------------|------|----------|-----------|----------|
|                    |      | Estimate | 95% CI    | <i>p</i> |
| Engagement         | 1    | .90      | .81 – .95 | <.001    |
|                    | 2    | .86      | .74 – .93 | <.001    |
|                    | 3    | .88      | .77 – .93 | <.001    |
|                    | 4    | .74      | .52 – .86 | <.001    |
|                    | 5    | .60      | .27 – .78 | .001     |
| Functionality      | 6    | .90      | .82 – .95 | <.001    |
|                    | 7    | .76      | .57 – .87 | <.001    |
|                    | 8    | .75      | .54 – .87 | <.001    |
|                    | 9    | .65      | .35 – .81 | <.001    |
| Aesthetics         | 10   | .89      | .78 – .94 | <.001    |
|                    | 11   | .84      | .70 – .91 | <.001    |
|                    | 12   | .88      | .79 – .94 | <.001    |
| Information*       | 13   | .88      | .77 – .93 | <.001    |
|                    | 14   | .72      | .47 – .85 | <.001    |
|                    | 15   | .92      | .85 – .96 | <.001    |
|                    | 16   | .87      | .75 – .93 | <.001    |
|                    | 17   | .59      | .18 – .80 | .006     |
|                    | 18   | .92      | .86 – .96 | <.001    |
| Subjective quality | 20   | .93      | .87 – .96 | <.001    |
|                    | 21   | .90      | .81 – .95 | <.001    |
|                    | 22   | .82      | .61 – .91 | <.001    |
|                    | 23   | .93      | .81 – .97 | <.001    |

\*Item 19 was excluded from all calculations because of lack of ratings

**Fig. S1** Spearman's  $\rho$  inter-item correlation coefficients, by rater (Rater 1: upper right triangle; Rater 2: lower left triangle) and subscale

|           |           |           |           |           |           |           |           |           |            |            |            |            |            |            |            |            |            |            |            |            |            |
|-----------|-----------|-----------|-----------|-----------|-----------|-----------|-----------|-----------|------------|------------|------------|------------|------------|------------|------------|------------|------------|------------|------------|------------|------------|
| <b>i1</b> | .89       | .35       | .52       | .60       | .12       | .13       | .20       | .31       | .76        | .66        | .73        | .13        | .08        | .37        | .62        | .54        | .53        | .70        | .68        | .62        | .75        |
| .85       | <b>i2</b> | .43       | .54       | .59       | .23       | .18       | .22       | .31       | .63        | .61        | .69        | .08        | .14        | .42        | .65        | .53        | .55        | .78        | .76        | .69        | .86        |
| .69       | .65       | <b>i3</b> | .51       | .26       | -.03      | -.32      | -.16      | .03       | .28        | .44        | .38        | .07        | -.20       | .10        | .40        | .21        | .24        | .39        | .53        | .50        | .40        |
| .39       | .41       | .34       | <b>i4</b> | .47       | .15       | -.05      | -.04      | .26       | .57        | .39        | .40        | .14        | .16        | .32        | .58        | .27        | .34        | .52        | .55        | .56        | .55        |
| .52       | .51       | .44       | .28       | <b>i5</b> | .53       | .25       | .51       | .51       | .57        | .41        | .43        | .35        | .24        | .61        | .60        | .48        | .60        | .77        | .66        | .69        | .71        |
| .07       | .11       | .07       | -.01      | .12       | <b>i6</b> | .32       | .64       | .58       | .26        | .10        | .18        | .38        | .43        | .54        | .17        | .32        | .29        | .47        | .39        | .40        | .43        |
| .32       | .42       | .18       | -.04      | .34       | .51       | <b>i7</b> | .56       | .42       | .31        | -.12       | .03        | .00        | .16        | .40        | .28        | .21        | .36        | .33        | .10        | .17        | .30        |
| .45       | .51       | .39       | .17       | .33       | .63       | .60       | <b>i8</b> | .53       | .26        | .06        | .18        | .23        | .27        | .39        | .21        | .12        | .38        | .42        | .25        | .24        | .34        |
| .41       | .41       | .32       | .11       | .41       | .55       | .79       | .74       | <b>i9</b> | .46        | .21        | .28        | .22        | .11        | .31        | .16        | .20        | .38        | .46        | .26        | .36        | .39        |
| .54       | .47       | .30       | .15       | .53       | .38       | .55       | .46       | .63       | <b>i10</b> | .63        | .73        | .23        | .14        | .40        | .66        | .61        | .47        | .64        | .57        | .64        | .65        |
| .77       | .70       | .61       | .23       | .66       | .10       | .35       | .42       | .42       | .60        | <b>i11</b> | .82        | .01        | -.11       | .18        | .50        | .33        | .19        | .45        | .53        | .49        | .52        |
| .77       | .73       | .61       | .20       | .58       | .10       | .31       | .44       | .40       | .58        | .92        | <b>i12</b> | .00        | .00        | .14        | .49        | .41        | .27        | .51        | .58        | .62        | .60        |
| .20       | .35       | .31       | .38       | .32       | .48       | .36       | .46       | .32       | .20        | .19        | .13        | <b>i13</b> | .43        | .22        | .24        | .31        | .18        | .24        | .16        | .14        | .18        |
| -.01      | .17       | .11       | .31       | .24       | .57       | .25       | .39       | .21       | .16        | .02        | .02        | .65        | <b>i14</b> | .30        | .14        | .38        | .24        | .30        | .33        | .21        | .30        |
| .33       | .35       | .34       | .11       | .41       | .45       | .28       | .44       | .37       | .33        | .34        | .39        | .30        | .24        | <b>i15</b> | .54        | .57        | .73        | .74        | .58        | .56        | .68        |
| .41       | .45       | .30       | .23       | .45       | .26       | .35       | .42       | .48       | .42        | .36        | .41        | .16        | .02        | .57        | <b>i16</b> | .34        | .51        | .68        | .64        | .62        | .73        |
| .50       | .51       | .41       | .01       | .53       | .34       | .46       | .49       | .50       | .60        | .70        | .71        | .31        | .19        | .54        | .66        | <b>i17</b> | .41        | .66        | .50        | .61        | .62        |
| .36       | .35       | .36       | .19       | .41       | .36       | .31       | .45       | .43       | .38        | .24        | .34        | .25        | .30        | .69        | .39        | .23        | <b>i18</b> | .79        | .66        | .54        | .72        |
| .58       | .61       | .47       | .23       | .64       | .37       | .53       | .51       | .56       | .61        | .61        | .63        | .26        | .27        | .72        | .66        | .76        | .58        | <b>i20</b> | .88        | .85        | .95        |
| .68       | .68       | .47       | .18       | .59       | .31       | .54       | .51       | .48       | .65        | .68        | .74        | .32        | .18        | .58        | .49        | .75        | .49        | .79        | <b>i21</b> | .81        | .87        |
| .57       | .63       | .42       | .17       | .61       | .18       | .37       | .40       | .26       | .46        | .64        | .67        | .29        | .25        | .50        | .39        | .63        | .45        | .76        | .72        | <b>i22</b> | .85        |
| .71       | .74       | .55       | .35       | .67       | .32       | .50       | .59       | .53       | .62        | .75        | .76        | .30        | .25        | .70        | .67        | .76        | .55        | .91        | .87        | .76        | <b>i23</b> |

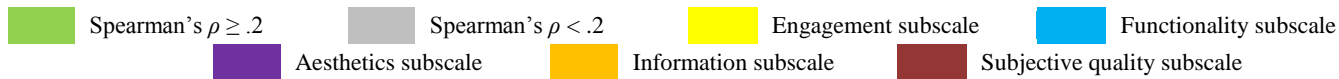

**Table S2** Item-subscale (uncorrected) Spearman's  $\rho$  correlation coefficients, by rater

| Subscale | Item | Rater 1    |            |            |            |            | Rater 2    |            |            |            |            |
|----------|------|------------|------------|------------|------------|------------|------------|------------|------------|------------|------------|
|          |      | ENG        | FUN        | AES        | INF*       | SUB        | ENG        | FUN        | AES        | INF*       | SUB        |
| ENG      | 1    | <b>.90</b> | .24        | .82        | .54        | .73        | <b>.89</b> | .37        | .77        | .43        | .67        |
|          | 2    | <b>.91</b> | .31        | .74        | .58        | .81        | <b>.89</b> | .44        | .71        | .52        | .71        |
|          | 3    | <b>.58</b> | -.11       | .42        | .19        | .45        | <b>.81</b> | .31        | .59        | .46        | .51        |
|          | 4    | <b>.74</b> | .12        | .48        | .46        | .59        | <b>.61</b> | .09        | .18        | .33        | .25        |
|          | 5    | .74        | .57        | .52        | .72        | <b>.76</b> | .67        | .32        | .66        | .57        | <b>.68</b> |
| FUN      | 6    | .26        | <b>.81</b> | .21        | .51        | .47        | .11        | <b>.78</b> | .20        | .56        | .37        |
|          | 7    | .08        | <b>.71</b> | .05        | .41        | .26        | .33        | <b>.84</b> | .42        | .46        | .55        |
|          | 8    | .21        | <b>.84</b> | .19        | .42        | .38        | .49        | <b>.87</b> | .53        | .64        | .56        |
|          | 9    | .37        | <b>.80</b> | .34        | .39        | .42        | .43        | <b>.89</b> | .53        | .57        | .54        |
| AES      | 10   | .71        | .42        | <b>.85</b> | .62        | .68        | .51        | .58        | <b>.75</b> | .50        | .65        |
|          | 11   | .62        | .11        | <b>.90</b> | .28        | .53        | .76        | .37        | <b>.95</b> | .42        | .71        |
|          | 12   | .68        | .24        | <b>.93</b> | .33        | .60        | .75        | .36        | <b>.95</b> | .45        | .75        |
| INF*     | 13   | .20        | .27        | .08        | <b>.52</b> | .21        | .38        | .48        | .19        | <b>.60</b> | .32        |
|          | 14   | .15        | .31        | .02        | <b>.53</b> | .32        | .21        | .41        | .06        | <b>.52</b> | .27        |
|          | 15   | .46        | .50        | .29        | <b>.83</b> | .71        | .40        | .40        | .42        | <b>.83</b> | .70        |
|          | 16   | .70        | .27        | .58        | .71        | <b>.72</b> | .46        | .41        | .43        | <b>.70</b> | .63        |
|          | 17   | .53        | .29        | .50        | <b>.67</b> | .64        | .52        | .51        | .74        | .69        | <b>.80</b> |
|          | 18   | .60        | .43        | .35        | <b>.77</b> | .74        | .44        | .41        | .38        | <b>.72</b> | .58        |
| SUB      | 20   | .81        | .54        | .60        | .85        | <b>.97</b> | .65        | .55        | .67        | .79        | <b>.95</b> |
|          | 21   | .81        | .35        | .64        | .69        | <b>.92</b> | .68        | .52        | .78        | .66        | <b>.92</b> |
|          | 22   | .77        | .39        | .66        | .67        | <b>.91</b> | .62        | .32        | .67        | .59        | <b>.82</b> |
|          | 23   | .85        | .47        | .66        | .80        | <b>.97</b> | .78        | .55        | .80        | .78        | <b>.97</b> |

The highest  $\rho$ s within subscales are highlighted in bold.

ENG, engagement; FUN, functionality; AES, aesthetics; INF, information; SUB, subjective quality.

\*Item 19 was excluded from all calculations because of lack of ratings

**Table S3** Generalised Ferguson's  $\delta$  and Loevinger's  $H$  scalability coefficients, by rater and subscale

| Subscale           | Ferguson's $\delta$ (95% CI) |                 | Loevinger's $H$ (SE) |           |
|--------------------|------------------------------|-----------------|----------------------|-----------|
|                    | Rater 1                      | Rater 2         | Rater 1              | Rater 2   |
| Engagement         | .91 (.88 – .93)              | .90 (.86 – .92) | .62 (.07)            | .62 (.07) |
| Functionality      | .84 (.79 – .88)              | .86 (.82 – .89) | .55 (.09)            | .73 (.06) |
| Aesthetics         | .86 (.80 – .89)              | .86 (.80 – .90) | .87 (.05)            | .82 (.06) |
| Information*       | .93 (.91 – .95)              | .92 (.89 – .95) | .44 (.08)            | .44 (.09) |
| MARS total score   | .96 (.95 – .97)              | .96 (.95 – .97) | .38 (.06)            | .45 (.07) |
| Subjective quality | .88 (.82 – .92)              | .89 (.85 – .91) | .95 (.02)            | .95 (.02) |

\*Item 19 was excluded from all calculations because of lack of ratings

**Fig. S2** Cohen's *d*s of score differences (average of two raters) in the MARS subscales

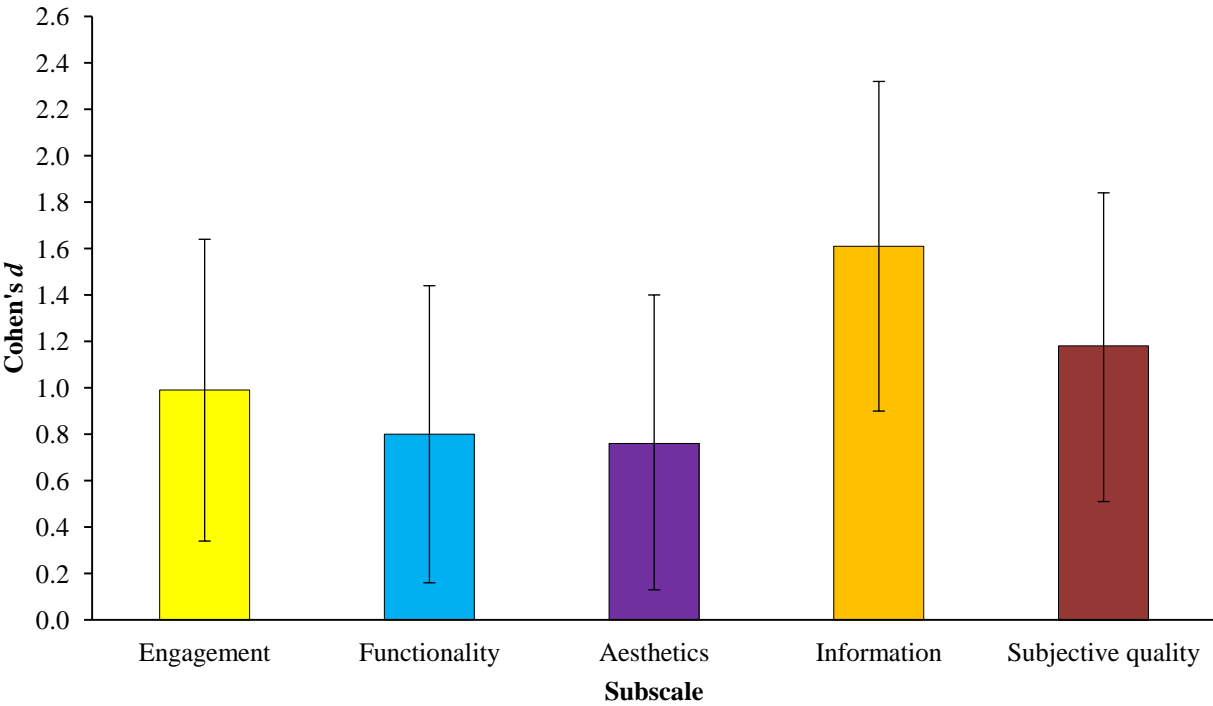

Supplement: MOESM2 [file 10348988]
