# Supplementary material for: Development and validation of the Italian version of the Mobile Application Rating Scale and its generalisability to apps targeting primary prevention
Source: PubMed Central journal article supplement (PMC4936279; doi:10.1186/s12911-016-0323-2), 2016-07-07
Supplement: 12911_2016_323_MOESM1_ESM.pdf [file 12911_2016_323_MOESM1_ESM.pdf]

## Mobile Application Rating Scale (versione italiana)

### Classificazione della app

La sezione di classificazione è usata per raccogliere descrizione e informazioni tecniche sulla app. Visualizzi la descrizione della app su iTunes/Google Play/Windows Store per avere queste informazioni.

**Nome app:** \_\_\_\_\_

**Voto app versione corrente:** \_\_\_\_\_

**Voto app tutte le versioni:** \_\_\_\_\_

**Sviluppatore:** \_\_\_\_\_

**N voti app versione corrente:** \_\_\_\_\_

**N voti app tutte le versioni:** \_\_\_\_\_

**Versione corrente:** \_\_\_\_\_

**Ultimo aggiornamento:** \_\_\_\_\_

**Costo versione base:** \_\_\_\_\_

**Costo versione *upgrade*:** \_\_\_\_\_

#### Piattaforma:

- iPhone
- iPad
- Android
- Windows Phone
- Altro \_\_\_\_\_

#### Breve descrizione:

---



---



---



---



---

#### Obiettivo della app (più risposte possibili)

- Aumentare il senso di benessere
- Mindfulness* (consapevolezza dei propri pensieri, azioni e motivazioni)/meditazione/rilassamento
- Ridurre emozioni negative
- Depressione
- Ansia/stress
- Rabbia
- Modifica del comportamento
- Alcol/uso di sostanze
- Fissare obiettivi
- Intrattenimento
- Relazioni
- Salute fisica
- Altro \_\_\_\_\_

**Base teorica/strategie (più risposte possibili)**

- Valutazione
- Feedback
- Informazione/educazione
- Monitoraggio/rilevamento nel tempo
- Fissare obiettivi
- Consigli/suggerimenti/strategie/formazione di competenze
- TCC – Terapia cognitivo-comportamentale
- ACT - *Acceptance and Commitment Therapy* (Terapia di accettazione e di impegno nell'azione)
- Mindfulness* (consapevolezza dei propri pensieri, azioni e motivazioni)/meditazione
- Rilassamento
- Gratitudine
- Approccio dei punti di forza
- Altro \_\_\_\_\_

**Affiliazione (fonte):**

- Sconosciuta
- Commerciale
- Governativa/ente pubblico
- ONG (Organizzazioni non governative)
- Università

**Fasce di età (più risposte possibili)**

- Bambini (sotto i 12 anni)
- Adolescenti (13-17 anni)
- Giovani adulti (18-25 anni)
- Adulti
- Generale (tutte le età)

**Aspetti tecnici della app (più risposte possibili)**

- Permette la condivisione (Facebook, Twitter ecc.)
- Ha una *community* (comunità virtuale/online) dedicata
- Permette la protezione tramite una password
- Richiede il login (credenziali)
- Invia dei *reminder* (promemoria)
- Per funzionare necessita della connessione Internet

## Valutazione di qualità della app

La scala di valutazione misura la qualità della app in quattro dimensioni o scale. Tutti gli item (domande) vengono valutati su una scala a 5 punti che va da “1. Inadeguato” a “5. Eccellente”. Scegli il numero che rappresenta in modo più accurato possibile la qualità dell’aspetto della app che Lei sta valutando. Usi le definizioni fornite per ciascuna categoria.

Sezione A.

**Coinvolgimento – divertente, interessante, personalizzabile, interattiva (per esempio, invia notifiche, messaggi, promemoria, feedback, permette la condivisione), ben diretta al suo pubblico**

1. **Intrattenimento: la app è divertente da usare? La app utilizza qualche strategia di intrattenimento (per esempio, attraverso la *gamification*/ludicizzazione) per aumentare il coinvolgimento?**
  - 1 Noiosa, non è per niente divertente
  - 2 Per lo più noiosa
  - 3 OK, sufficientemente divertente per intrattenere l’utente per un breve periodo di tempo (< 5 minuti)
  - 4 Abbastanza divertente, potrebbe intrattenere l’utente per un po’ di tempo (5–10 minuti in totale)
  - 5 Molto divertente, potrebbe stimolare l’utente ad utilizzarla più volte
  
2. **Interesse: la app è interessante da usare? La app utilizza qualche strategia per aumentare il coinvolgimento presentando i suoi contenuti in modo interessante?**
  - 1 Non è per niente interessante
  - 2 Per lo più non interessante
  - 3 OK, né molto né poco interessante, potrebbe coinvolgere l’utente per un breve periodo di tempo (< 5 minuti)
  - 4 Abbastanza interessante, potrebbe coinvolgere l’utente per un po’ di tempo (5–10 minuti in totale)
  - 5 Molto interessante, potrebbe stimolare l’utente ad utilizzarla più volte
  
3. **Personalizzazione: la app fornisce/memorizza tutte le impostazioni/preferenze necessarie per personalizzarne le caratteristiche (per esempio, suoni, contenuto, notifiche ecc. )?**
  - 1 Non permette alcuna personalizzazione o richiede che le impostazioni vengano inserite ogni volta
  - 2 Consente una insufficiente personalizzazione limitandone le funzioni
  - 3 Consente una personalizzazione di base per funzionare adeguatamente
  - 4 Fornisce numerose opzioni per la personalizzazione
  - 5 Consente una completa personalizzazione delle caratteristiche/preferenze, memorizza tutte le impostazioni
  
4. **Interattività: la app permette l’input da parte dell’utente, fornisce feedback, contiene suggerimenti (remainder/promemoria, opzioni di condivisione, notifiche, ecc.)? Nota: queste funzionalità devono essere personalizzabili e non sopraffare l’utente per essere perfette.**
  - 1 Nessuna funzionalità interattiva e/o nessuna risposta all’interazione con l’utente
  - 2 Interattività o feedback o possibilità di input dell’utente insufficienti, limitando le funzioni della app
  - 3 Funzionalità interattive di base per funzionare adeguatamente
  - 4 Offre una varietà di opzioni di funzionalità interattive/feedback/input dell’utente
  - 5 Livello di responsività molto elevato attraverso opzioni di funzionalità interattive/feedback/input dell’utente
  
5. **Gruppo target: il contenuto della app (informazioni visive, linguaggio, design) è appropriato per il pubblico a cui la app è destinata?**
  - 1 Completamente inappropriata/non chiara/genera sempre confusione
  - 2 Per lo più inappropriata/non chiara/genera confusione
  - 3 Accettabile ma non mirata. Potrebbe risultare inappropriata/non chiara/generare confusione
  - 4 Ben diretta all’obiettivo, con problemi trascurabili
  - 5 Perfettamente diretta all’obiettivo, priva di alcun problema

**A. Punteggio medio del coinvolgimento = \_\_\_\_\_**

## SEZIONE B

**Funzionalità – funzionamento della app, facilità di apprendimento, navigazione, flusso logico e design d'interazione gestuale della app**

- 6. Prestazione: quanto sono accurati/veloci le funzioni e i componenti (pulsanti/menu) della app?**
- 1 La app non funziona; risposta assente/insufficiente/inaccurata (per esempio, *crash*: blocchi o terminazioni improvvise, *bug*: difetti di programmazione, comandi non funzionanti ecc.)
  - 2 Alcune funzionalità vanno ma sono lente o contengono problemi tecnici maggiori
  - 3 A grandi linee la app funziona. A volte, ci sono alcuni problemi tecnici da risolvere/rallentamenti
  - 4 Per lo più funzionale con problemi minori/trascurabili
  - 5 Risposta perfetta/tempestiva; nessun *bug* tecnico (difetti di programmazione)/contiene un misuratore di “tempo di caricamento rimanente”
- 7. Facilità di utilizzo: quanto è facile imparare a usare la app; quanto sono chiare le etichette/icone del menu e le istruzioni?**
- 1 Istruzioni mancanti/limitate; le etichette/icone del menu generano confusione; complicata
  - 2 Usabile dopo molto tempo/molti sforzi
  - 3 Usabile dopo qualche tempo/qualche sforzo
  - 4 Facile da imparare (o contiene istruzioni chiare)
  - 5 Si usa immediatamente; intuitiva; semplice
- 8. Navigazione: il muoversi tra le schermate è logico/accurato/appropriato/ininterrotto; i link/collegamenti a tutte le schermate che li necessitano sono presenti?**
- 1 All'interno della app diverse sezioni sembrano logicamente scollegate e la navigazione è difficile
  - 2 Usabile dopo molto tempo/molti sforzi
  - 3 Usabile dopo qualche tempo/qualche sforzo
  - 4 Facile da usare o mancante di pochi trascurabili link/collegamenti
  - 5 Il flusso tra le schermate è sempre perfettamente logico, facile, chiaro e intuitivo o offre scorciatoie
- 9. Design d'interazione gestuale: le interazioni tramite tocco (per esempio, *tap*: toccare, *swipe*: scorrere in orizzontale, *scroll*: scorrere in verticale, *pinch*: zoomare) sono coerenti e intuitive in tutti i componenti e in tutte le schermate?**
- 1 Completamente incoerente/genera sempre confusione
  - 2 Spesso incoerente/genera spesso confusione
  - 3 OK con qualche elemento incoerente/talvolta genera confusione
  - 4 Per lo più coerente/intuitiva con problemi trascurabili
  - 5 Perfettamente coerente e intuitiva

**B. Punteggio medio della funzionalità = \_\_\_\_\_**

## SEZIONE C

**Estetica – design grafico, piacevolezza visiva complessiva, schema colore e coerenza stilistica****10. Layout (disposizione): la collocazione e le dimensioni di pulsanti/icone/menu/contenuti sulle schermate sono appropriate o possono essere ingrandite/zoomate se necessario?**

- 1 Design molto scarso, caotico, alcune opzioni impossibili da selezionare/localizzare/vedere/leggere; schermo del dispositivo non ottimizzabile
- 2 Design scarso, casuale, non chiaro, alcune opzioni difficili da selezionare/localizzare/vedere/leggere
- 3 Soddisfacente, pochi problemi nel selezionare/localizzare/vedere/leggere le opzioni o con problemi minori di dimensione dello schermo
- 4 Per lo più chiaro, permette di selezionare/localizzare/vedere/leggere le opzioni
- 5 Professionale, semplice, chiaro, ordinato, organizzato in modo logico, ottimizzato alle dimensioni dello schermo del dispositivo. Ogni componente del design ha il suo scopo

**11. Grafica: quanto è alta la qualità/risoluzione della grafica usata per pulsanti/icone/menu/contenuti?**

- 1 La grafica appare amatoriale, design visivo molto scarso: sproporzionato, completamente incoerente dal punto di vista stilistico
- 2 Grafica di bassa qualità/bassa risoluzione; design visivo di bassa qualità: sproporzionato, incoerente dal punto di vista stilistico
- 3 Grafica e design visivo di media qualità (per lo più coerente nello stile)
- 4 Grafica e design visivo di alta qualità e risoluzione: per lo più proporzionato, coerente dal punto di vista stilistico
- 5 Grafica e design visivo di altissima qualità e risoluzione: proporzionato, coerente dal punto di vista stilistico

**12. Piacevolezza visiva: la app è bella?**

- 1 Nessuna piacevolezza visiva, sgradevole da guardare, mal disegnata, colori mal abbinati
- 2 Poca piacevolezza visiva: mal disegnata, cattivo uso dei colori, visivamente noiosa
- 3 Media piacevolezza visiva: ordinaria, né gradevole né sgradevole
- 4 Alto livello di piacevolezza visiva: grafica senza stonature, coerente e professionalmente disegnata
- 5 Come sopra + molto attraente, da ricordare, degna di nota; l'uso dei colori potenzia le funzionalità/menu della app

**C. Punteggio medio dell'estetica = \_\_\_\_\_**

## SEZIONE D

**Informazioni – contiene informazioni di alta qualità (per esempio, testo, feedback, misure, bibliografia) provenienti da fonti credibili. Selezioni N/A se quell'aspetto della app è irrilevante**

**13. Accuratezza della descrizione della app (nell'app store): la app contiene ciò che è descritto?**

- 1 Fuorviante. La app non contiene i componenti/le funzionalità descritti. Oppure non ha descrizione
- 2 Inaccurata. La app contiene pochissimi dei componenti/funzionalità descritti
- 3 OK. La app contiene alcuni dei componenti/funzionalità descritti
- 4 Accurata. La app contiene la maggior parte dei componenti/funzionalità descritti
- 5 Descrizione molto accurata dei componenti/funzionalità della app

**14. Obiettivi: la app ha obiettivi specifici, misurabili e raggiungibili (specificati nella descrizione dell'app store o all'interno della app)?**

N/A La descrizione non indica gli obiettivi o gli obiettivi della app sono irrilevanti allo scopo della ricerca (per esempio, un gioco per scopi educativi)

- 1 La app non ha possibilità di raggiungere gli obiettivi prefissati
- 2 La descrizione elenca alcuni obiettivi ma la app ha pochissima possibilità di raggiungerli
- 3 OK. La app ha obiettivi chiari, che possono essere raggiunti
- 4 La app ha obiettivi chiaramente specificati, che sono misurabili e raggiungibili
- 5 La app ha obiettivi specifici e misurabili, che molto probabilmente saranno raggiunti

**15. Qualità delle informazioni: il contenuto della app è corretto, ben scritto e rilevante per l'obiettivo/argomento della app?**

N/A Non ci sono informazioni all'interno della app

- 1 Irrilevante/inappropriato/incoerente/scorretto
- 2 Scarso. A malapena rilevante/appropriato/coerente/può essere scorretto
- 3 Mediamente rilevante/appropriato/coerente/sembra corretto
- 4 Rilevante/appropriato/coerente/corretto
- 5 Altamente rilevante, appropriato, coerente e corretto

**16. Quantità di informazioni: è sufficiente per raggiungere l'obiettivo della app; le informazioni sono complete ma sintetiche?**

N/A Non ci sono informazioni all'interno della app

- 1 Minima o eccessiva
- 2 Insufficiente o verosimilmente eccessiva
- 3 OK ma non completa né sintetica
- 4 Offre un ampio spettro di informazioni, presenta alcune lacune o inutili dettagli o non ha link/collegamenti a ulteriori informazioni o risorse
- 5 Completa e sintetica; contiene link/collegamenti a ulteriori informazioni o risorse

**17. Informazioni visuali: la spiegazione visiva dei concetti attraverso diagrammi/grafici/immagini/video ecc. è chiara, logica, corretta?**

N/A Non ci sono informazioni visuali all'interno della app (per esempio, contiene solo audio o testo)

- 1 Completamente non chiare/generano sempre confusione/sbagliate o necessarie ma mancanti
- 2 Per lo più non chiare/generano confusione/sbagliate
- 3 OK ma spesso non chiare/generano confusione/sbagliate
- 4 Per lo più chiare/logiche/corrette con problemi trascurabili
- 5 Perfettamente chiare/logiche/corrette

**18. Credibilità: la app proviene da una fonte attendibile (specificata nella descrizione dell'app store o all'interno della app)?**

- 1 La fonte si identifica ma la sua credibilità/attendibilità è dubbia (per esempio, attività commerciale con tornaconto personale)
- 2 Sembra avere una fonte credibile che però non può essere verificata (per esempio, non ha una pagina web)
- 3 Sviluppata da una piccola organizzazione non governativa/istituzione (ospedale/centro ecc.)/attività commerciale specializzata, agenzia di finanziamento
- 4 Sviluppata dal governo, dall'università o come sopra ma di dimensioni maggiori
- 5 Sviluppata utilizzando finanziamenti governativi su base competitiva o fondi di ricerca (per esempio, MIUR – Ministero dell'Istruzione, dell'Università e della Ricerca)

**19. Prove di efficacia: la app è stata testata/studiata; deve essere verificabile (pubblicazioni nella letteratura scientifica)?**

N/A La app non è stata testata/studiata

- 1 L'evidenza suggerisce che la app non funziona
- 2 La app è stata studiata (per esempio, accettabilità, usabilità, valutazione di soddisfazione) e ha outcomes parzialmente positivi in studi non randomizzati controllati o poche prove di efficacia o assenza di prove di efficacia contraddittorie
- 3 La app è stata studiata (per esempio, accettabilità, usabilità, valutazione di soddisfazione) e ha outcomes positivi in studi non randomizzati controllati e assenza di prove di efficacia contraddittorie
- 4 La app è stata studiata in 1-2 studi randomizzati controllati che hanno verificato l'outcome con risultati favorevoli
- 5 La app è stata studiata in  $\geq 3$  studi randomizzati controllati che hanno verificato l'outcome con risultati favorevoli

**D. Punteggio medio delle informazioni = \_\_\_\_\_\***

\*Escluda le domande la cui risposta è N/A dal calcolo della media

## Qualità soggettiva della app

### Sezione E

**20. Raccomanderebbe questa app alle persone che potrebbero beneficiarne?**

- |   |                  |                                            |
|---|------------------|--------------------------------------------|
| 1 | Assolutamente no | Non raccomanderei questa app a nessuno     |
| 2 |                  | Raccomanderei questa app a poche persone   |
| 3 | Forse            | Raccomanderei questa app a diverse persone |
| 4 |                  | Raccomanderei questa app a molte persone   |
| 5 | Assolutamente sì | Raccomanderei questa app a tutti           |

**21. Quante volte utilizzerebbe questa app nei prossimi 12 mesi se fosse utile per Lei?**

- 1 Nessuna
- 2 1-2
- 3 3-10
- 4 10-50
- 5 > 50

**22. Comprerebbe questa app?**

- 1 No
- 3 Forse
- 5 Sì

**23. Come valuta complessivamente la app?**

- |   |       |                                  |
|---|-------|----------------------------------|
| 1 | ★     | Una delle peggiori app mai usate |
| 2 | ★★    |                                  |
| 3 | ★★★   | Nella media                      |
| 4 | ★★★★  |                                  |
| 5 | ★★★★★ | Una delle migliori app mai usate |



**Punteggio**

Punteggi di qualità della app per

SEZIONE

A. Punteggio medio del coinvolgimento = \_\_\_\_\_

B. Punteggio medio della funzionalità = \_\_\_\_\_

C. Punteggio medio dell'estetica = \_\_\_\_\_

D. Punteggio medio delle informazioni = \_\_\_\_\_

**Punteggio medio qualità della app = \_\_\_\_\_**

**Punteggio qualità soggettiva della app = \_\_\_\_\_**

## Sezione specifica per la app

Questi item supplementari possono essere modificati e usati per valutare l'impatto percepito della app su conoscenze, atteggiamenti, intenzioni di cambiare dell'utente così come la probabilità di un'effettiva modifica del comportamento relativo alla salute in oggetto.

### Sezione F

1. **Consapevolezza: è probabile che questa app aumenti la consapevolezza dell'importanza di affrontare [inserire il comportamento relativo alla salute in oggetto]**
  - 1 In completo disaccordo
  - 2
  - 3
  - 4
  - 5 Completamente d'accordo
  
2. **Conoscenze: è probabile che questa app aumenti le conoscenze/comprendione di [inserire il comportamento relativo alla salute in oggetto]**
  - 1 In completo disaccordo
  - 2
  - 3
  - 4
  - 5 Completamente d'accordo
  
3. **Atteggiamenti: è probabile che questa app migliori gli atteggiamenti relativamente a [inserire il comportamento relativo alla salute in oggetto]**
  - 1 In completo disaccordo
  - 2
  - 3
  - 4
  - 5 Completamente d'accordo
  
4. **Intenzioni di cambiare: è probabile che questa app aumenti le intenzioni/motivazioni di affrontare [inserire il comportamento relativo alla salute in oggetto]**
  - 1 In completo disaccordo
  - 2
  - 3
  - 4
  - 5 Completamente d'accordo
  
5. **Richiesta di aiuto (*help seeking*): è probabile che l'uso di questa app incoraggi ulteriormente la richiesta di aiuto per [inserire il comportamento relativo alla salute in oggetto]**
  - 1 In completo disaccordo
  - 2
  - 3
  - 4
  - 5 Completamente d'accordo
  
6. **Modifica del comportamento: è probabile che l'uso di questa app aumenti/diminuisca [inserire il comportamento relativo alla salute in oggetto]**
  - 1 In completo disaccordo
  - 2
  - 3
  - 4
  - 5 Completamente d'accordo
